# Supplementary material for: Application of a kinetic energy partitioning scheme for ab initio molecular dynamics to reactions associated with ionization in water tetramers
Source: Royal Society of Chemistry journal article supplement (doi:10.1039/b713456h), 2008-01-01
Supplement: b713456h.pdf [file b713456h.pdf]

Supplementary Data

The definition of the internal coordinate defined by \$ZMAT in HONDO or GAMESS format.

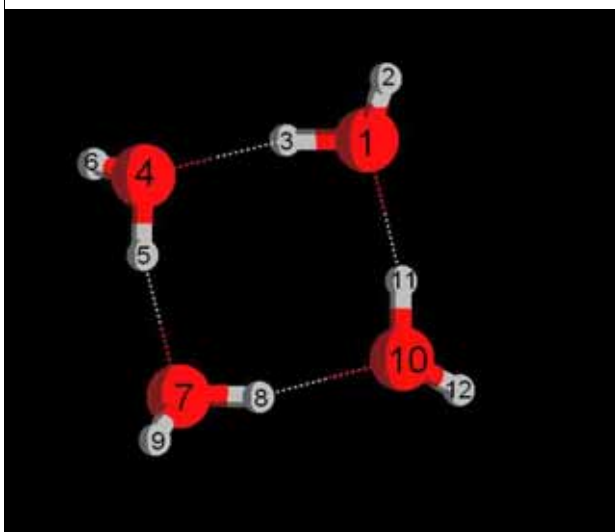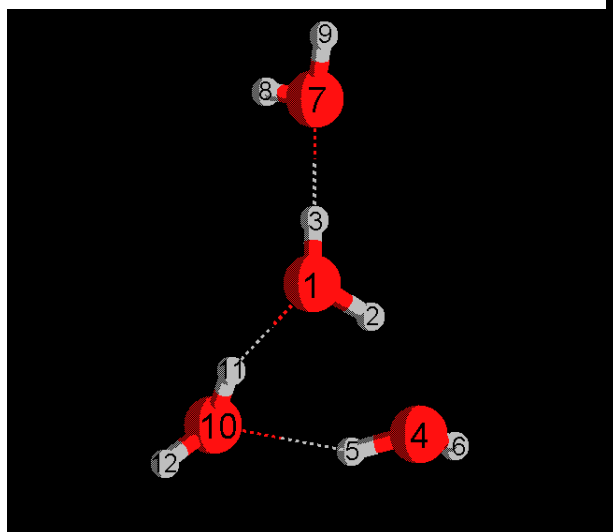

“cyclic” tetramer internal-coordinate

\$ZMAT NZMOD=21,

IZMAT=

1, 1,2,  
 1, 1,3,  
 2, 2,1,3,  
 1, 4,5,  
 1, 5,6,  
 2, 4,5,6,  
 1, 7,8,  
 1, 7,9,  
 2, 8,7,9,  
 1, 4,2,  
 2, 2,4,5,  
 2, 2,4,6,  
 1, 7,5,  
 2, 5,7,8,  
 2, 5,7,9,  
 3, 4,2,1,3,  
 3, 4,5,1,3,  
 3, 4,6,1,3,  
 3, 7,5,4,6,  
 3, 7,8,4,6,  
 3, 7,9,4,6,  
 \$END

“branched” internal-coordinate

\$ZMAT NZMOD=21,

IZMAT =

1, 1,2,  
 1, 1,3,  
 2, 2,1,3,  
 1, 4,5,  
 1, 5,6,  
 2, 4,5,6,  
 1, 7,8,  
 1, 7,9,  
 2, 8,7,9,  
 1, 4,2,  
 2, 2,4,5,  
 2, 2,4,6,  
 1, 7,3,  
 2, 3,7,8,  
 2, 3,7,9,  
 3, 4,2,1,3,  
 3, 4,5,1,3,  
 3, 4,6,1,3,  
 3, 7,3,1,2,  
 3, 7,8,1,2,  
 3, 7,9,1,2,  
 \$END
